# Supplementary material
Source: Springer Nature journal article supplement (https://www.springermedizin.de/resource/supplementary/13075_2010_3028_MOESM8_ESM.pdf/9693370)

**A**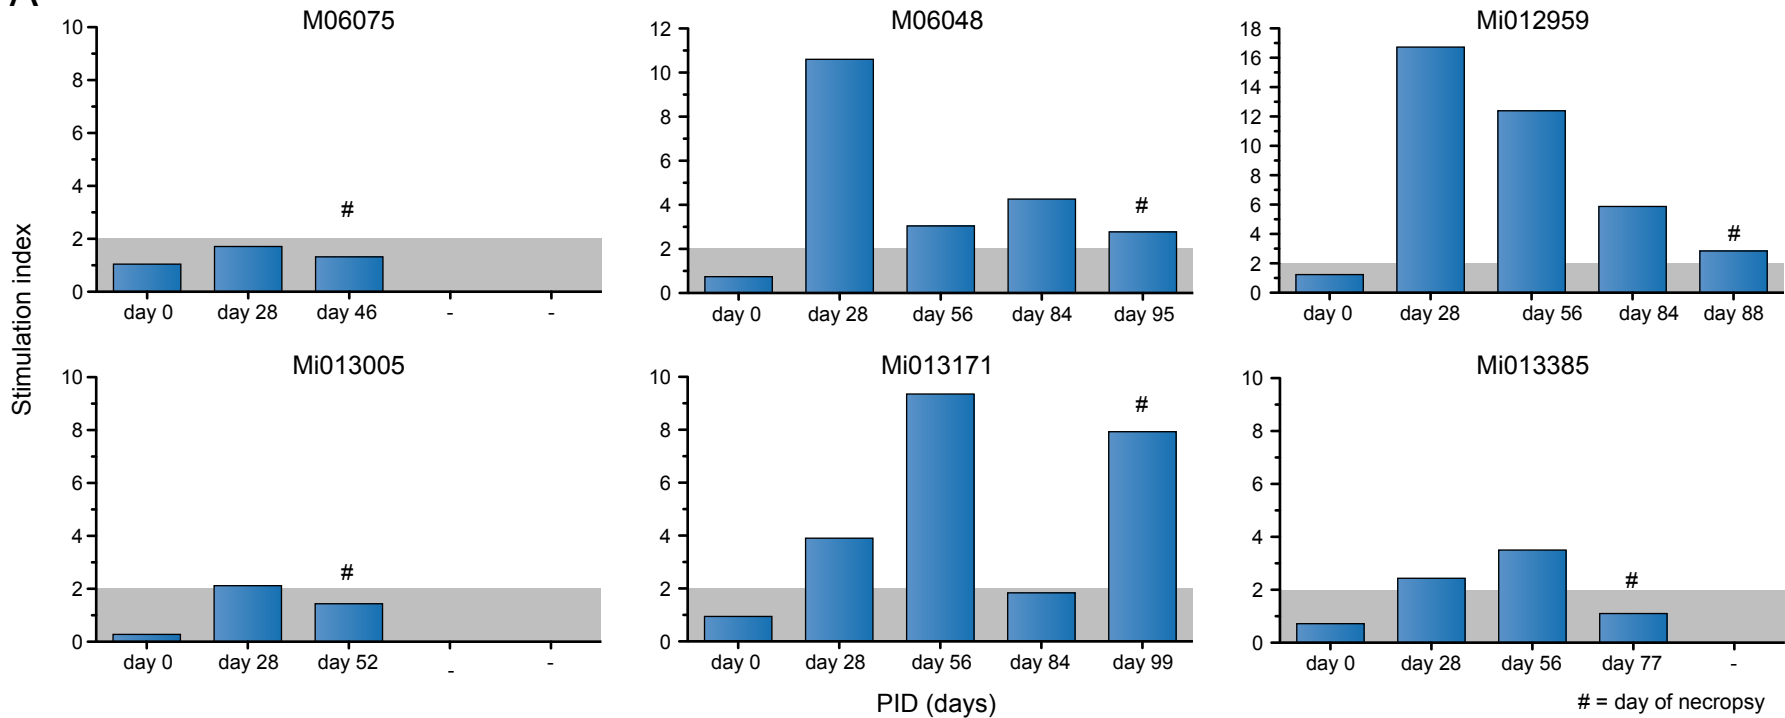**B**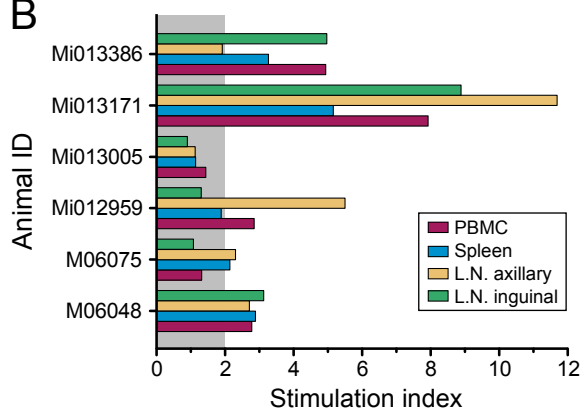**C**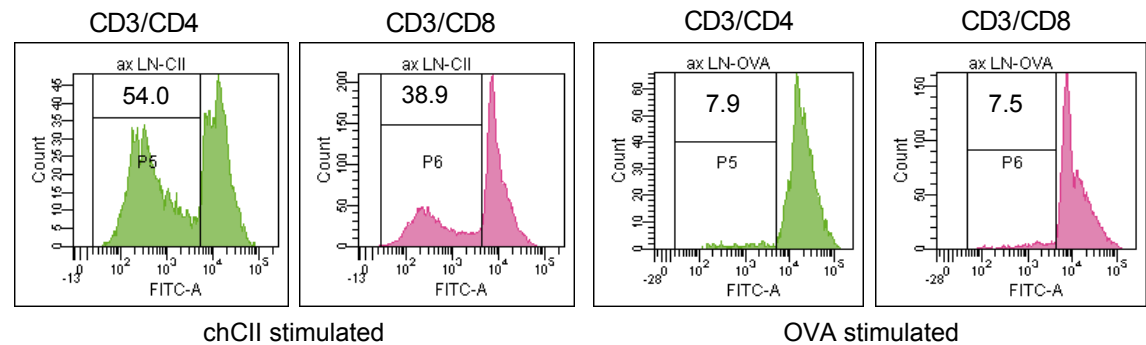

Supplement: MOESM8 [file 9693370]
